# Supplementary material for: Donor functionalized ruthenium N-heterocyclic carbene complexes in alcohol oxidation reactions
Source: Royal Society of Chemistry journal article supplement (doi:10.1039/c3dt53125b), 2014-01-01

## Electronic Supplementary Information (ESI)

Table S1. Structural data and refinement parameters of (4a) and (3b).

|                                                  | <b>4a</b> ·(PF <sub>6</sub> ) <sub>2</sub>                                        | <b>3b</b> ·(PF <sub>6</sub> ) <sub>2</sub> ·CH <sub>2</sub> Cl <sub>2</sub>       |
|--------------------------------------------------|-----------------------------------------------------------------------------------|-----------------------------------------------------------------------------------|
| Formula                                          | C <sub>47</sub> H <sub>44</sub> F <sub>12</sub> N <sub>7</sub> OP <sub>3</sub> Ru | C <sub>40</sub> H <sub>39</sub> F <sub>12</sub> N <sub>6</sub> OP <sub>3</sub> Ru |
| Formula weight                                   | 1144.87                                                                           | 1112.65                                                                           |
| <i>T</i> (K)                                     | 223(2)                                                                            | 296(2)                                                                            |
| Crystal size [mm]                                | 0.34 × 0.32 × 0.15                                                                | 0.42 × 0.38 × 0.31                                                                |
| Crystal system                                   | Triclinic                                                                         | Orthorhombic                                                                      |
| Space group, ( <i>Z</i> )                        | P-1, (2)                                                                          | P2(1)2(1)2(1), (4)                                                                |
| <i>a</i> (Å)                                     | 12.1842(6)                                                                        | 11.6726(7)                                                                        |
| <i>b</i> (Å)                                     | 13.2317(8)                                                                        | 18.6442(11)                                                                       |
| <i>c</i> (Å)                                     | 16.7148(8)                                                                        | 21.5813(13)                                                                       |
| <i>α</i> (°)                                     | 84.6250(10)                                                                       | 90.00                                                                             |
| <i>β</i> (°)                                     | 76.0910(10)                                                                       | 90.00                                                                             |
| <i>γ</i> (°)                                     | 71.8680(10)                                                                       | 90.00                                                                             |
| <i>V</i> (Å <sup>3</sup> )                       | 2485.3(2)                                                                         | 4696.7(5)                                                                         |
| <i>λ</i> (Å)                                     | 0.71073                                                                           | 0.71073                                                                           |
| Dcalc (mg/m <sup>3</sup> )                       | 1.530                                                                             | 1.574                                                                             |
| Abs coeff (mm <sup>-1</sup> )                    | 0.501                                                                             | 0.637                                                                             |
| <i>θ</i> min, max                                | 1.26, 26.50                                                                       | 1.44, 25.04                                                                       |
| Reflections number, total/unique                 | 18346/ 10220 [ <i>R</i> <sub>int</sub> =0.0252]                                   | 13978 / 8260 [ <i>R</i> <sub>int</sub> = 0.0367]                                  |
| Refinement method                                | Full-matrix least-squares on <i>F</i> <sup>2</sup>                                | Full-matrix least-squares on <i>F</i> <sup>2</sup>                                |
| Data / restraints / parameters                   | 10220 / 0 / 643                                                                   | 8260 / 0 / 586                                                                    |
| Goodness-of-fit on <i>F</i> <sup>2</sup>         | 1.056                                                                             | 1.031                                                                             |
| Final <i>R</i> [ <i>I</i> > 2σ( <i>I</i> )]      | <i>R</i> <sub>1</sub> = 0.0491, <i>wR</i> <sup>2</sup> = 0.1378                   | <i>R</i> <sub>1</sub> = 0.0519, <i>wR</i> <sup>2</sup> = 0.1251                   |
| <i>R</i> indices (all data)                      | <i>R</i> <sub>1</sub> = 0.0603, <i>wR</i> <sup>2</sup> = 0.1493                   | <i>R</i> <sub>1</sub> = 0.0818, <i>wR</i> <sup>2</sup> = 0.1444                   |
| Largest diff. peak and hole (e.Å <sup>-3</sup> ) | 1.238 and -0.723                                                                  | 0.742 and -0.512                                                                  |

## NMR Spectra of compounds reported

### Compound 1a.

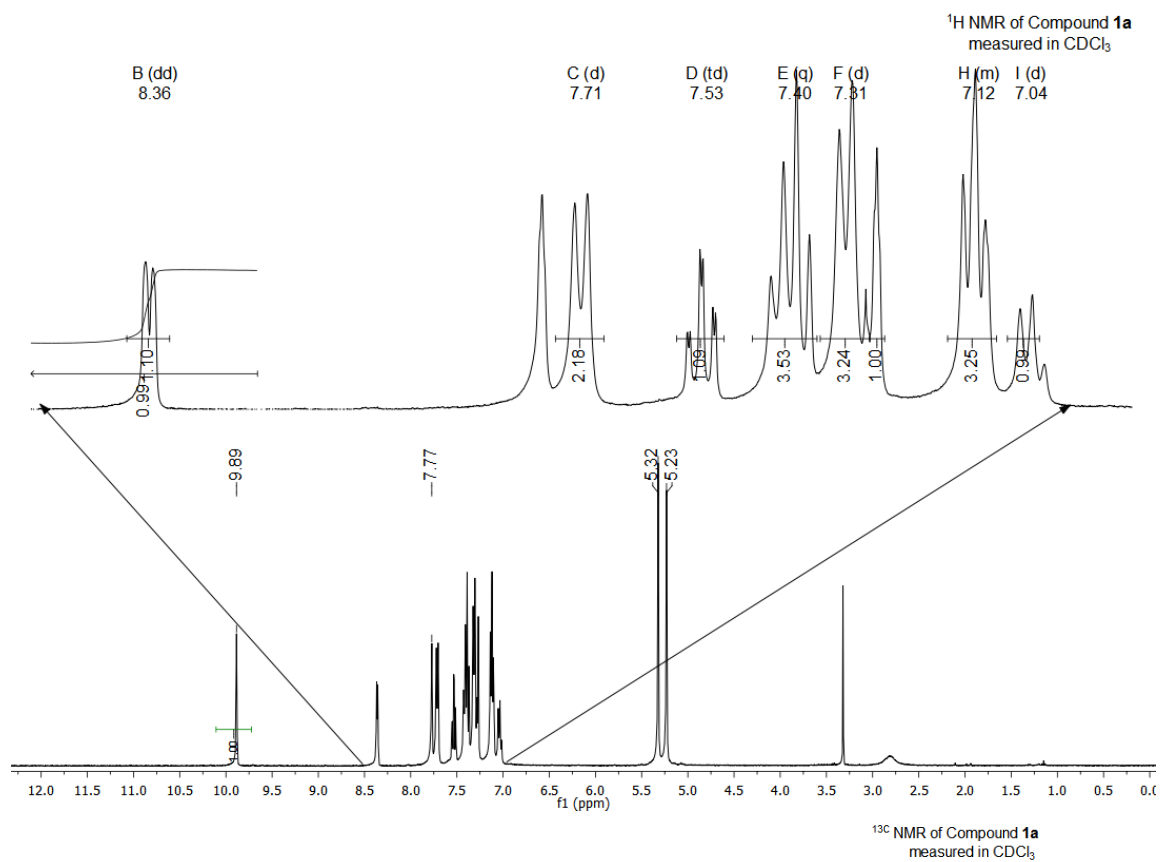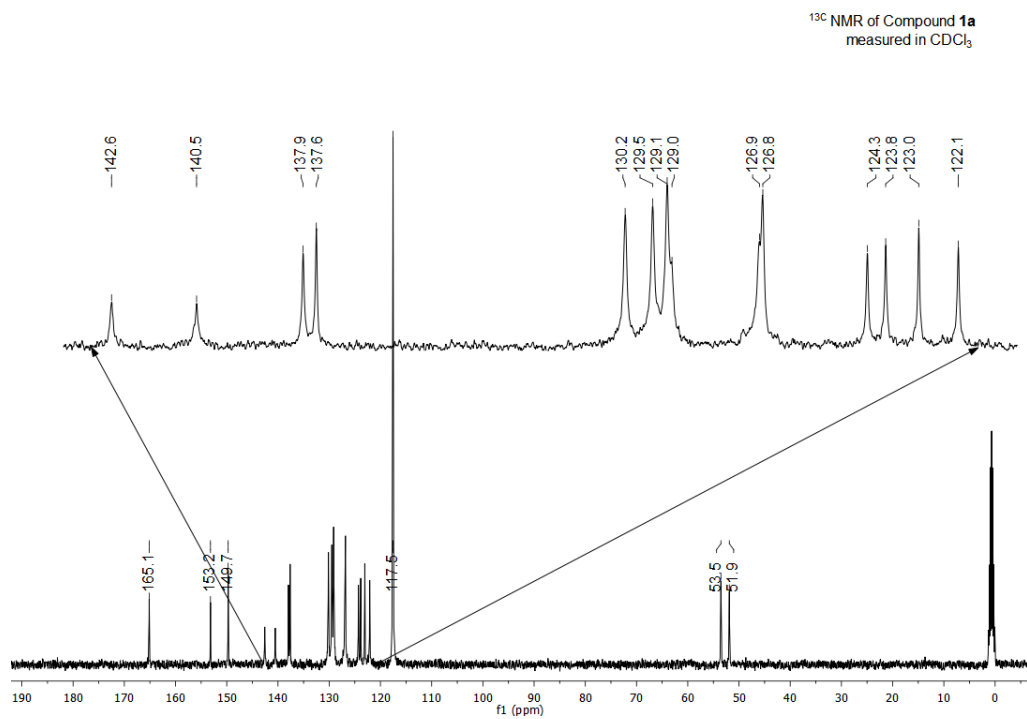

### Compound 1b.

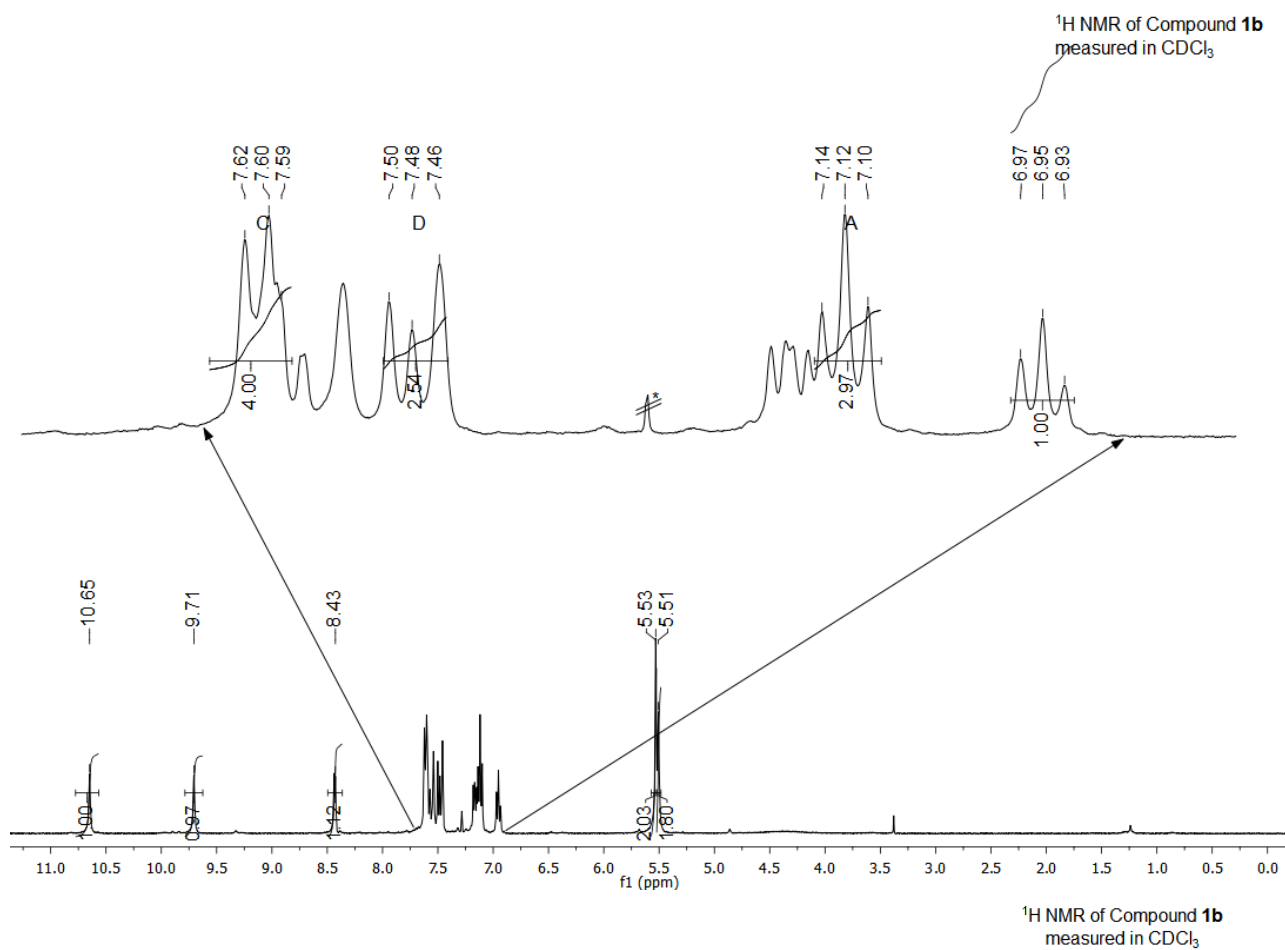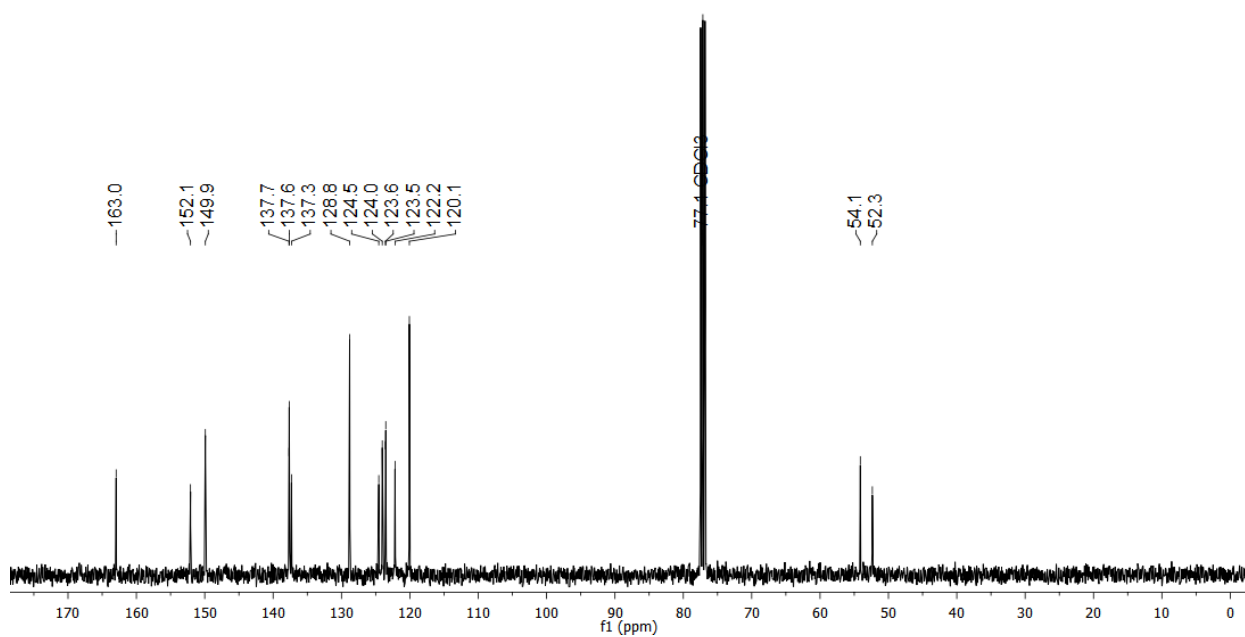

### Compound 2a.

<sup>1</sup>H NMR of Compound **2a**  
measured in CDCl<sub>3</sub>

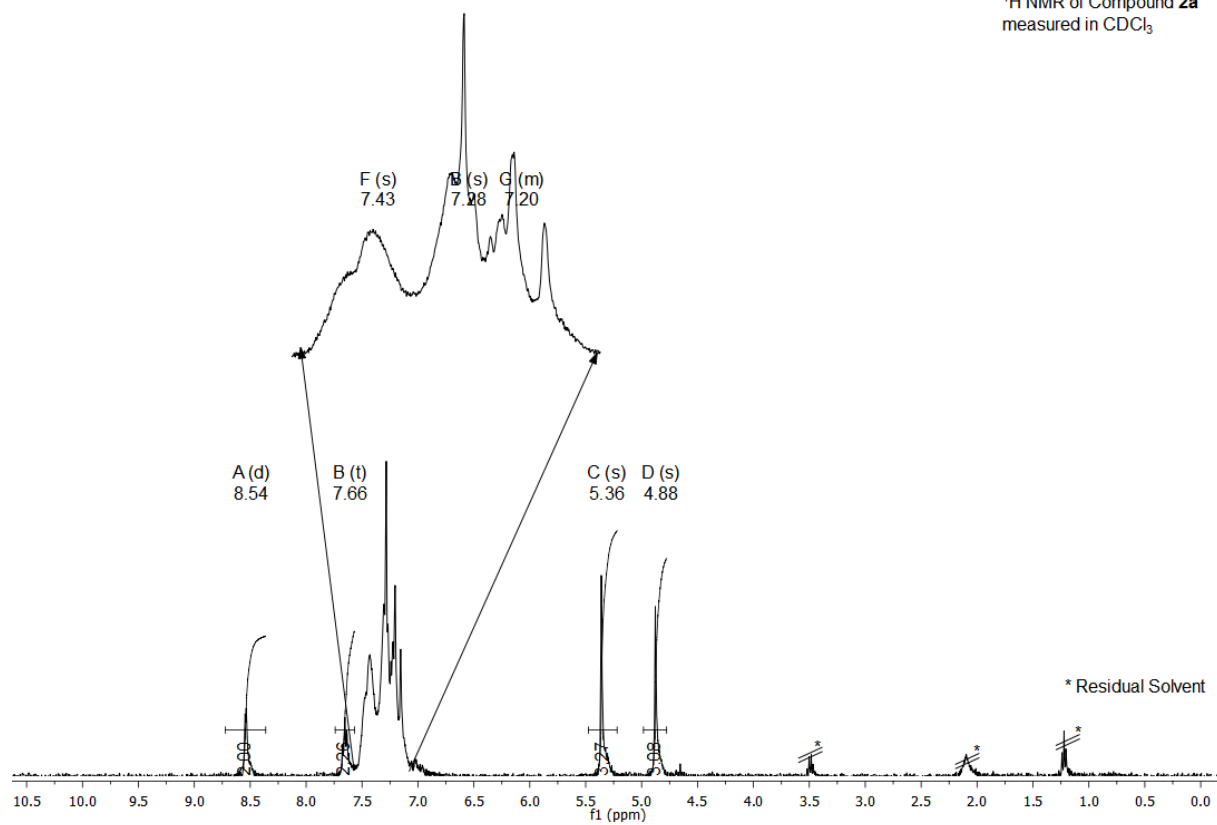

<sup>13</sup>C NMR of Compound **2a**  
measured in CDCl<sub>3</sub>

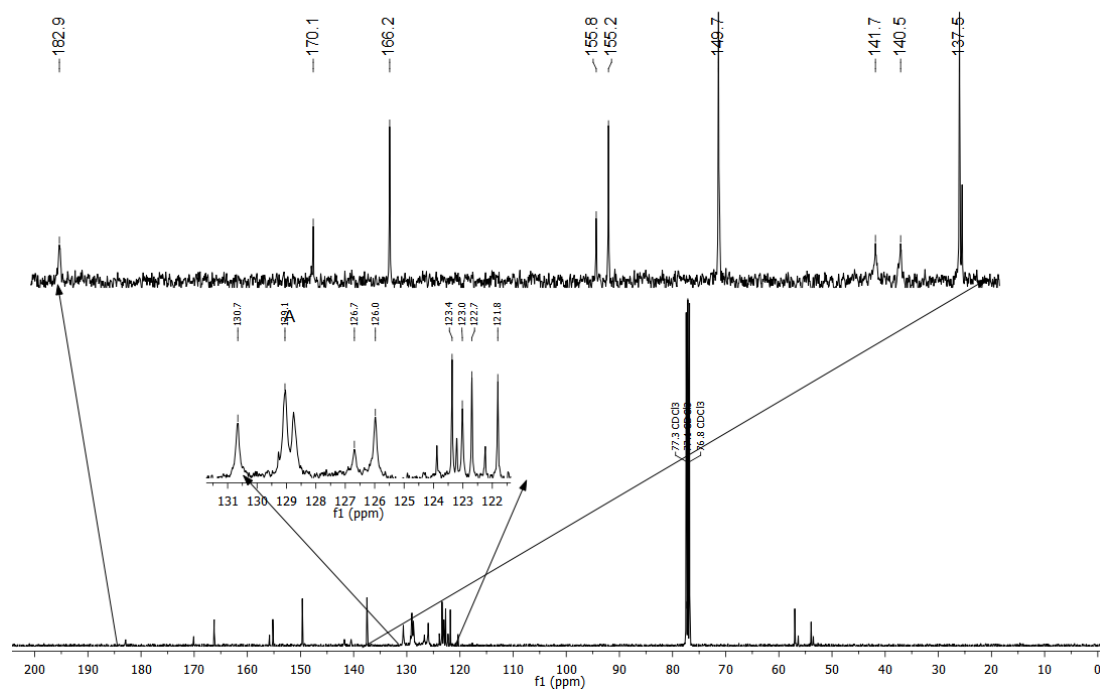

## Compound 2b.

sarah.1134.1.1r  
1H

<sup>1</sup>H NMR of Compound 2b  
measured in CDCl<sub>3</sub>

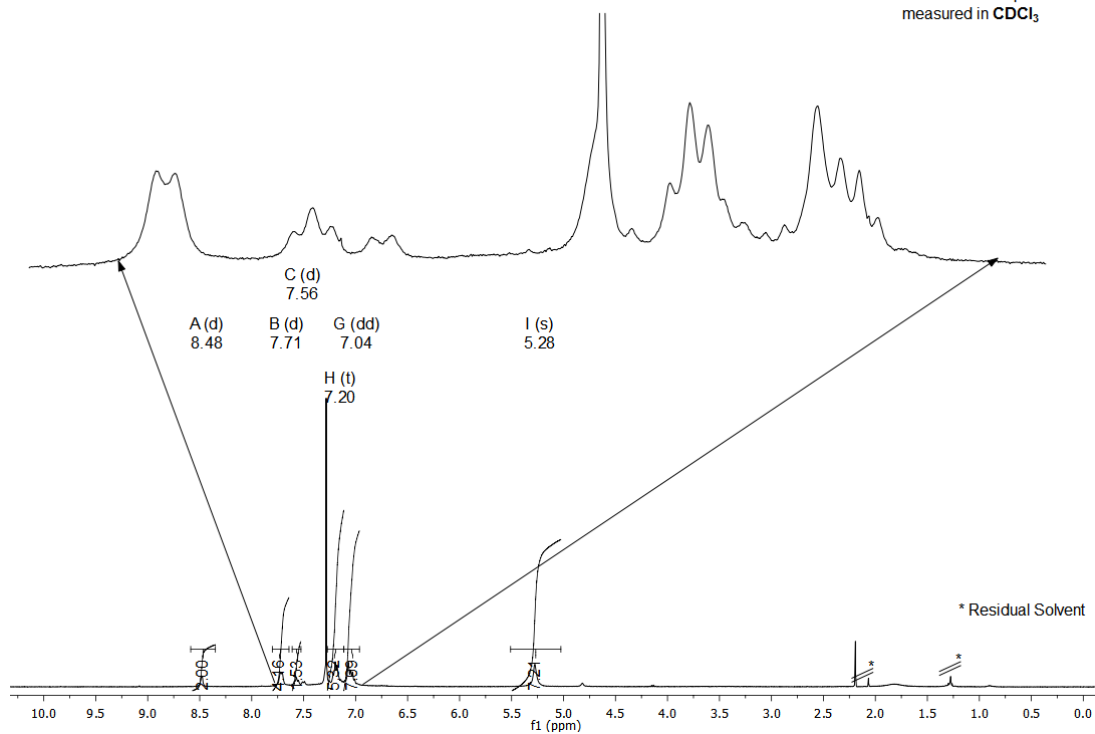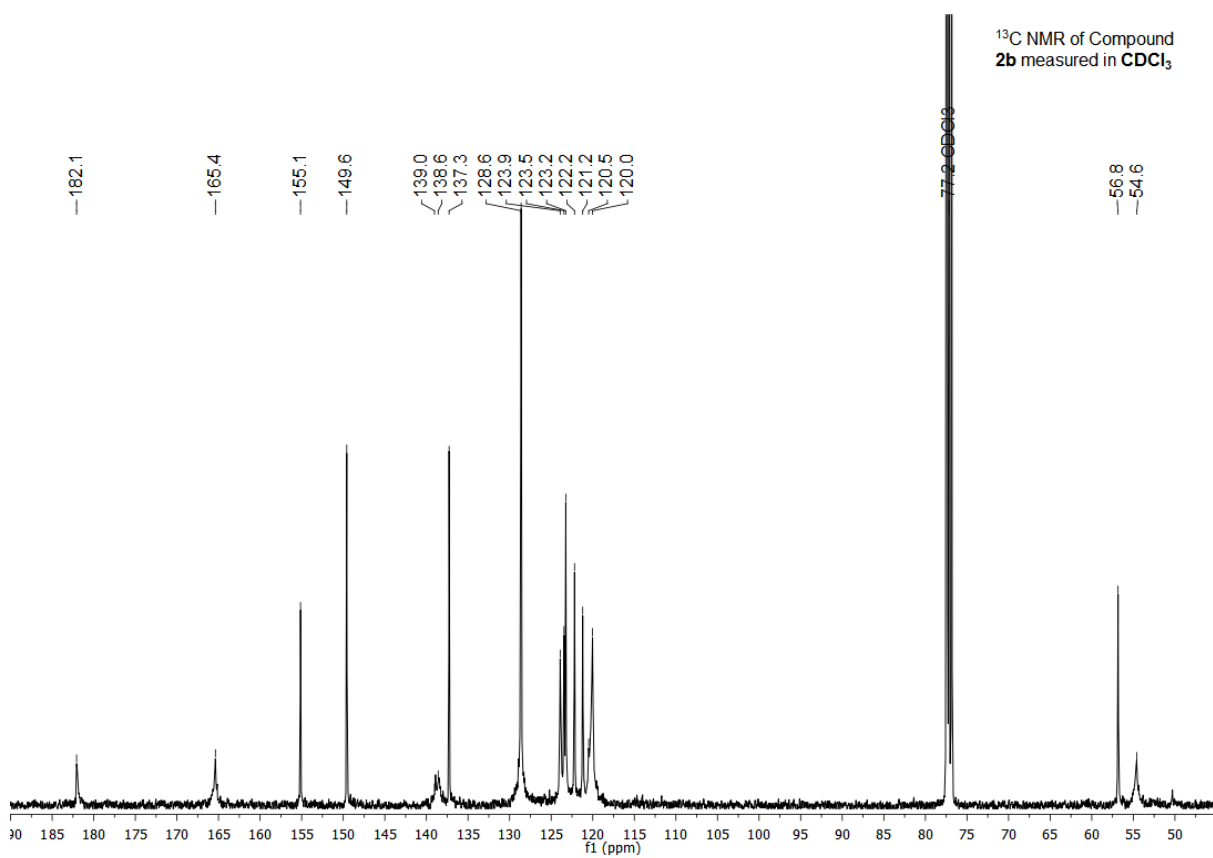

## Compound 3a.

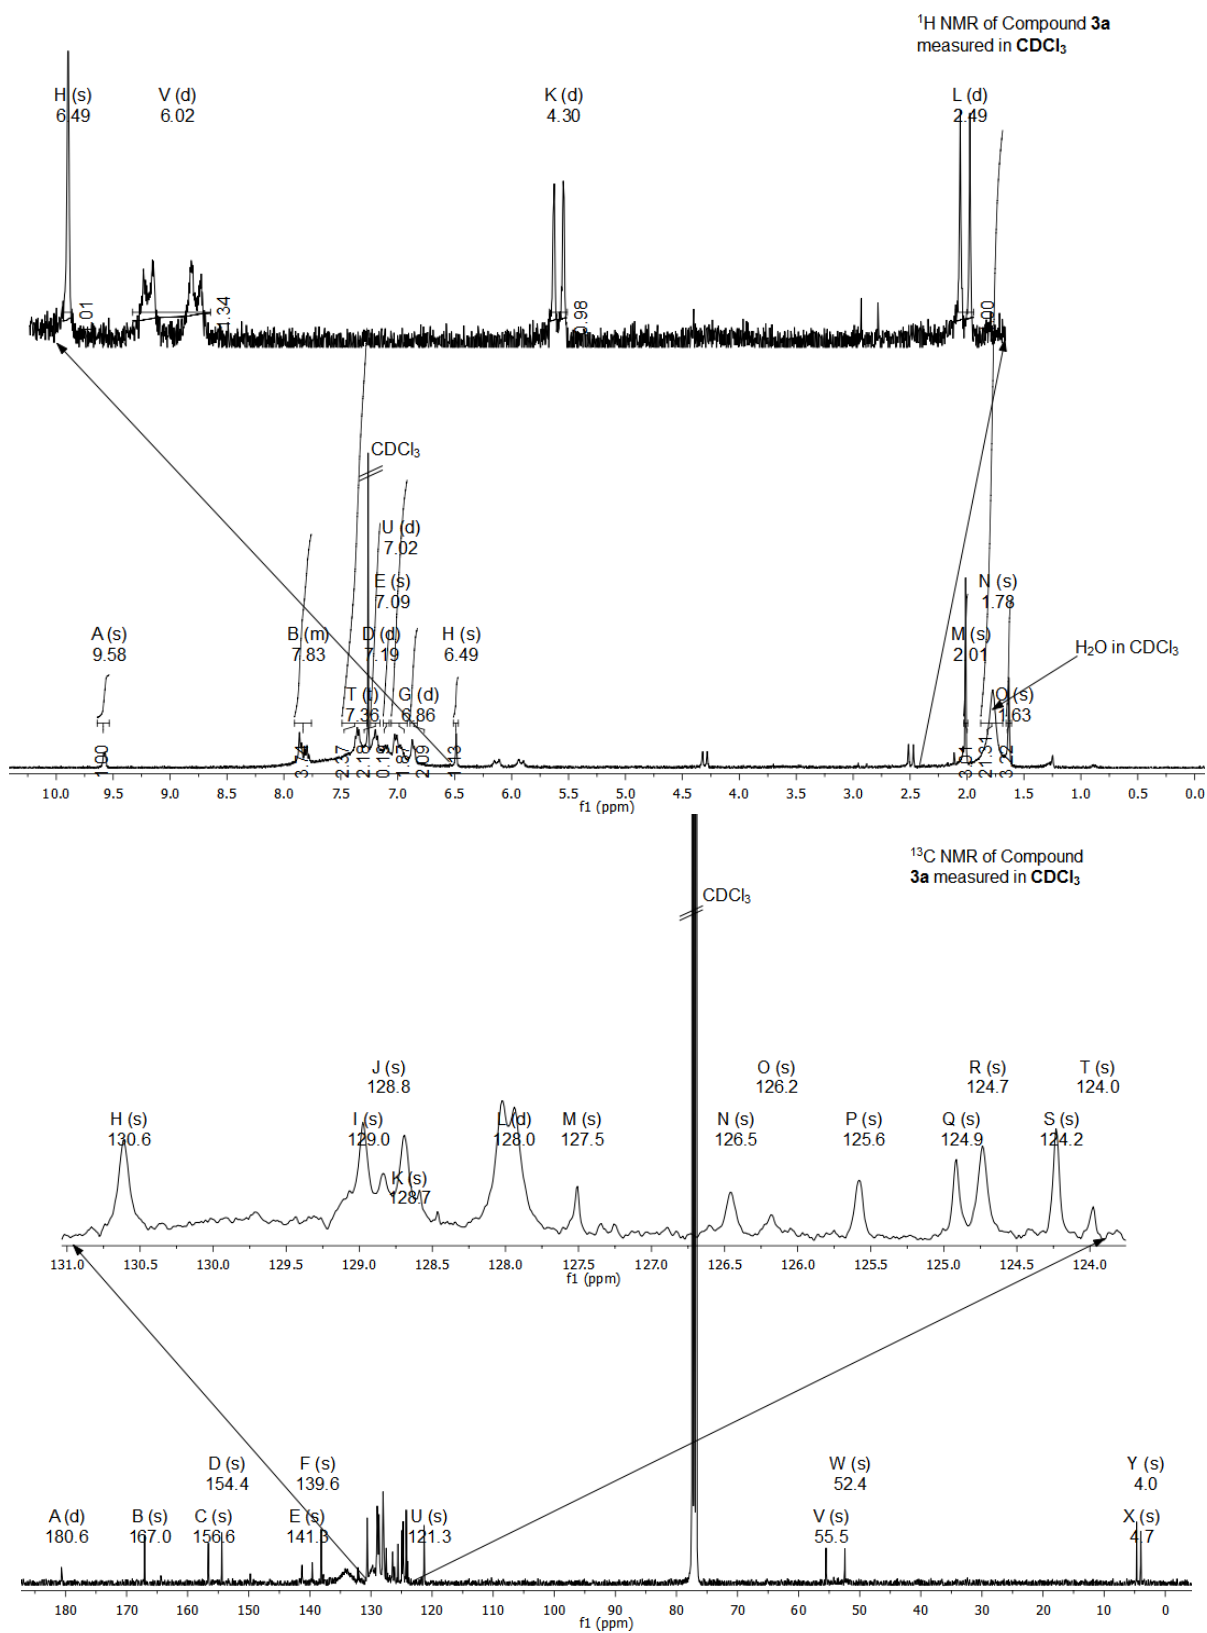

### Compound 3b.

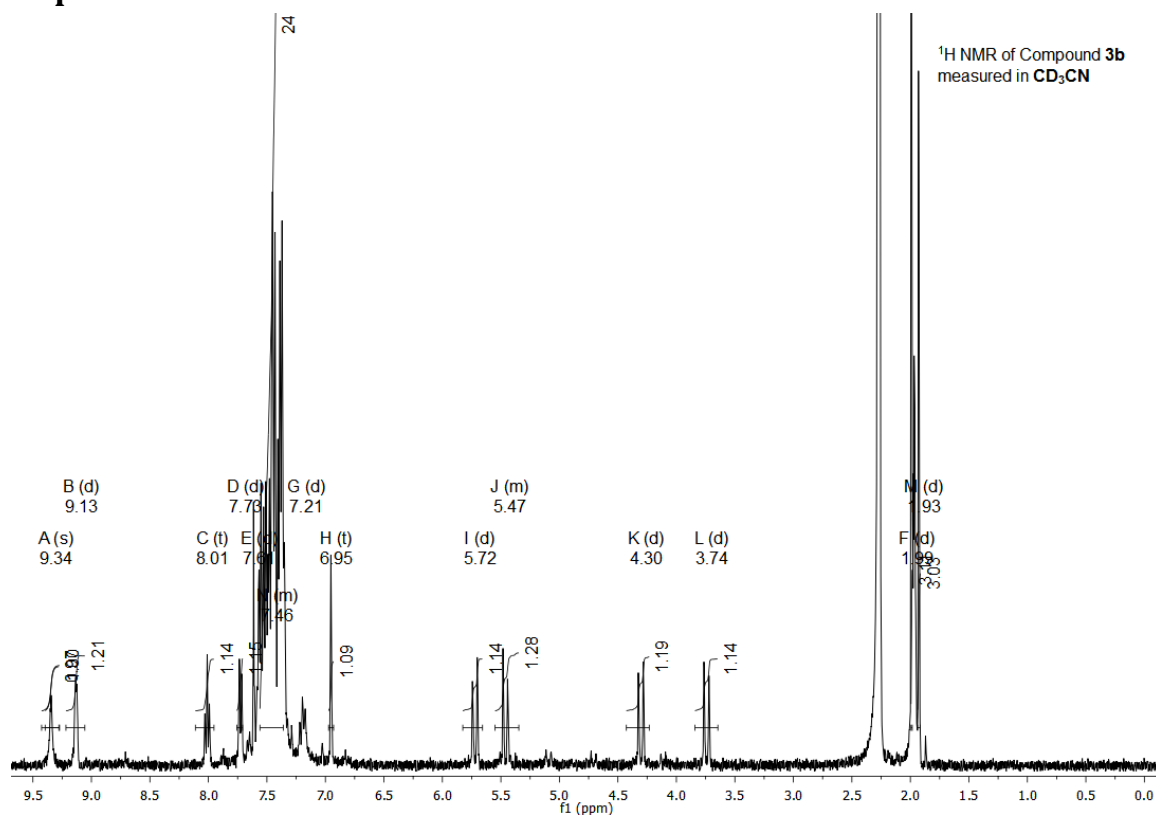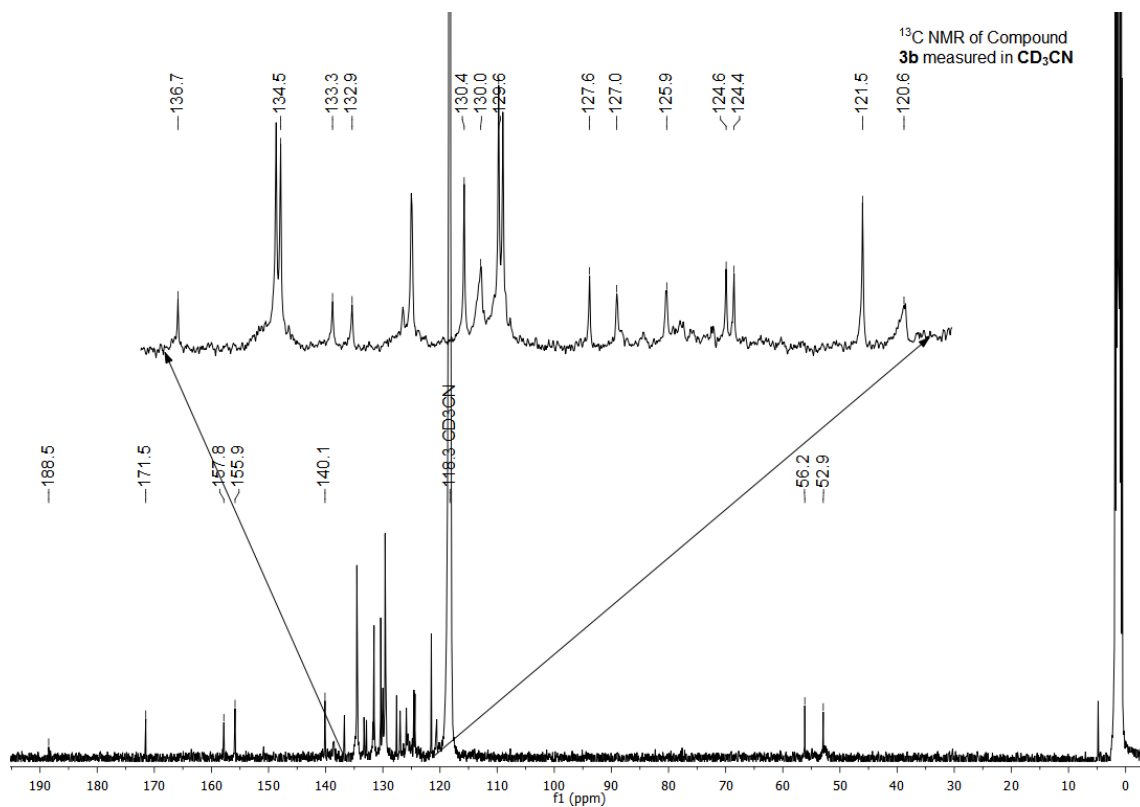

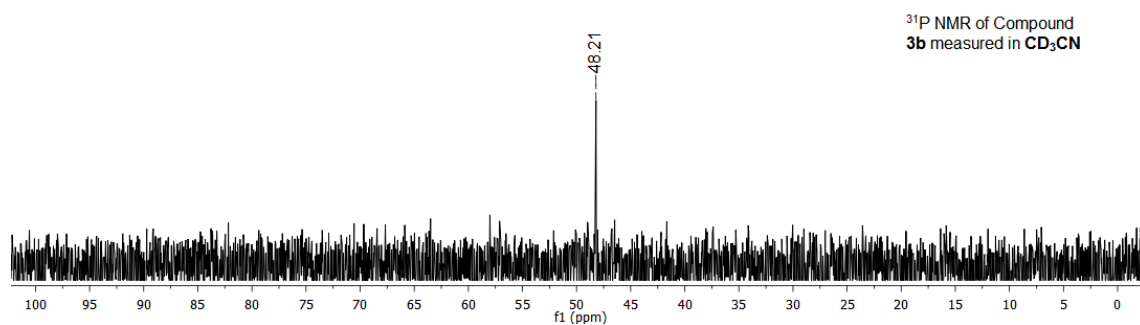

### Compound 4a.

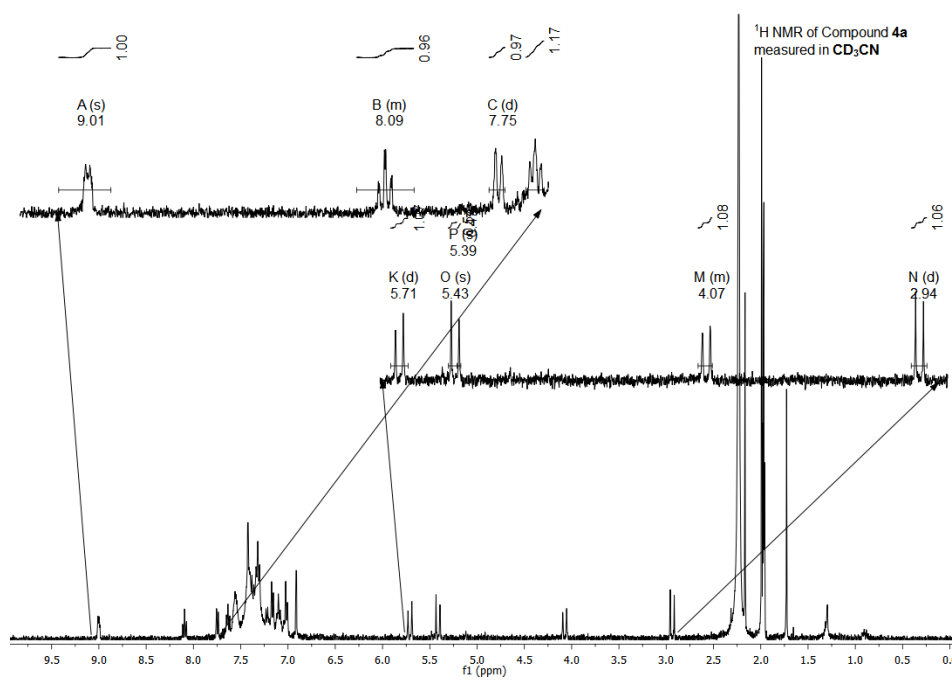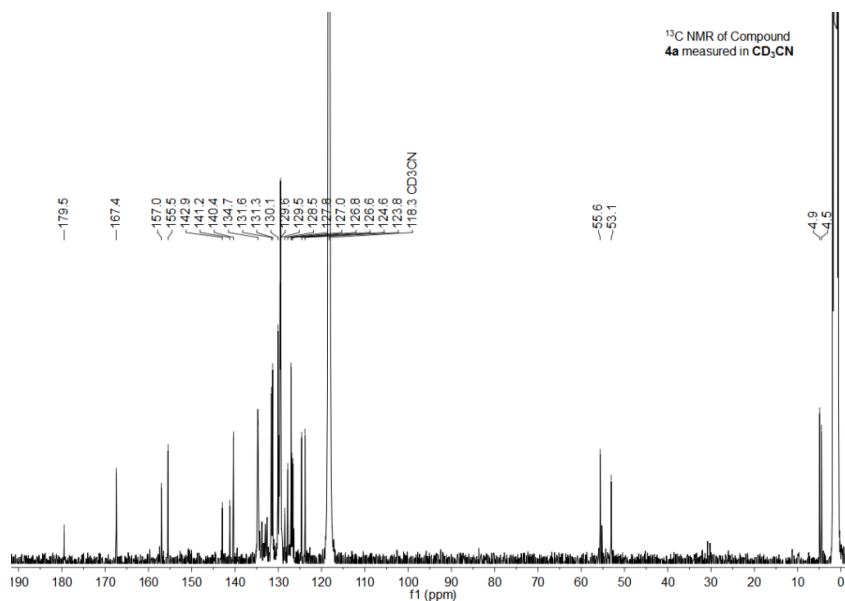



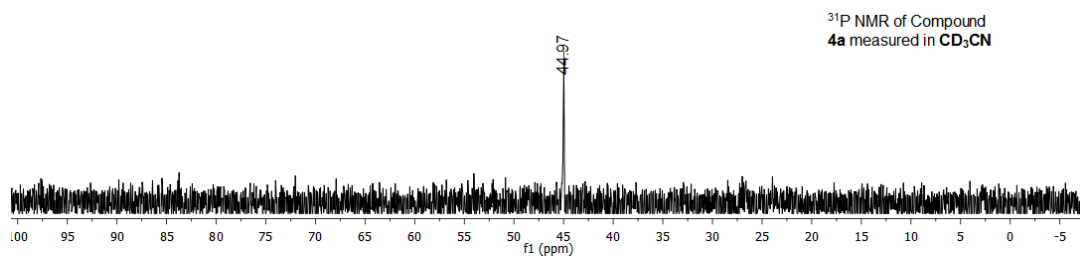

Supplement: c3dt53125b.pdf [file c3dt53125b.pdf]
